# Supplementary material
Source: MDPI journal article supplement (https://www.mdpi.com/2076-3263/14/2/43)
Supplement: s1 [file s1]

|           | Raw Data       |                 |                      |             | Log Data  |          |          |
|-----------|----------------|-----------------|----------------------|-------------|-----------|----------|----------|
|           | Simple         | Full            | Post                 |             | Simple    | Full     | Post     |
| Intercept | 0.626          | 15.597          | 12.026<br>*          | (Intercept) | 16.329*** | -74.749  | -83.127* |
|           | (2.457)        | (11.596)        | (4.935<br>)          |             | (4.060)   | (62.095) | (29.940) |
| Ti.Al     | 226.403<br>*** | -184.52<br>4    | -143.9<br>20         | Ti.Al       | 2.394**   | -7.372   | -12.874  |
|           | (61.557)       | (319.35<br>7)   | (94.83<br>5)         |             | (0.782)   | (29.283) | (12.958) |
| Si.Al     | -0.928*<br>*   | -0.241          |                      | Si.Al       | -0.810+   | 1.064    | 0.106    |
|           | (0.333)        | (1.994)         |                      |             | (0.446)   | (5.287)  | (2.686)  |
| P.Al      | 19.550         | 1519.12<br>5    | 1867.6<br>32**       | P.Al        | -0.078    | -1.163   | 1.041    |
|           | (184.51<br>2)  | (2314.5<br>83)  | (614.1<br>27)        |             | (0.228)   | (11.712) | (5.235)  |
| Ni.Al     | 6.478          | -15569.<br>341+ | -1530<br>7.441*<br>* | Ni.Al       | -0.027    | -8.845   | -9.307+  |
|           | (653.85<br>0)  | (8073.3<br>03)  | (3947.<br>721)       |             | (0.358)   | (10.147) | (5.071)  |

| Raw Data |                 |                |                 | Log Data |         |         |         |
|----------|-----------------|----------------|-----------------|----------|---------|---------|---------|
|          | Simple          | Full           | Post            |          | Simple  | Full    | Post    |
| Cu.Al    | 1051.81<br>8**  | 18556.7<br>85+ | 20389.<br>997** | Cu.Al    | 0.320+  | −2.514  | −3.404  |
|          | (307.47<br>6)   | (8628.0<br>58) | (5549.<br>881)  |          | (0.177) | (4.737) | (2.559) |
| U.Al     | 874.910         | 1676.36<br>4   | 1430.0<br>28    | U.Al     | 0.411   | −6.561  | −5.569+ |
|          | (1012.6<br>13)  | (3441.8<br>38) | (2240.<br>033)  |          | (0.245) | (6.108) | (2.731) |
| Mo.Al    | 2003.80<br>9*** | 2016.73<br>6   | 1293.0<br>89    | Mo.Al    | 0.458** | −2.006  | −3.649* |
|          | (469.84<br>5)   | (2437.6<br>28) | (903.6<br>41)   |          | (0.126) | (3.571) | (1.466) |
| Fe.Al    | −5.512          | −5.299         | −3.222          | Fe.Al    | −0.448* | 4.142   | 3.288   |
|          | (4.005)         | (9.052)        | (5.771<br>)     |          | (0.199) | (5.905) | (2.675) |
| Zr.Al    | −2027.5<br>11*  | −2064.1<br>40+ | −2036.<br>758** | Zr.Al    | −0.155  | 0.173   | 0.226+  |
|          | (879.90<br>7)   | (1120.3<br>84) | (658.9<br>88)   |          | (0.102) | (0.228) | (0.128) |

|                  | Raw Data |                  |                        | Log Data         |         |         |
|------------------|----------|------------------|------------------------|------------------|---------|---------|
|                  | Simple   | Full             | Post                   | Simple           | Full    | Post    |
| Ti.Al ×<br>Si.Al |          | -3.203           |                        | Ti.Al × Si.Al    | -1.588  | -1.683  |
|                  |          | (35.594)         |                        |                  | (2.399) | (1.229) |
| Ti.Al ×<br>Ni.Al |          | 212557.<br>166+  | 20426<br>7.700*<br>*   | Ti.Al × Ni.Al    | -1.729  | -1.764  |
|                  |          | (115135<br>.850) | (7030<br>4.851)        |                  | (5.312) | (2.157) |
| Ti.Al ×<br>Cu.Al |          | -19137<br>1.925  | -2209<br>76.656<br>*   | Ti.Al ×<br>Cu.Al | 0.273   | -0.449  |
|                  |          | (229014<br>.030) | (9803<br>3.400)        |                  | (2.096) | (0.917) |
| Si.Al ×<br>P.Al  |          | 94.052           |                        | Si.Al × P.Al     | 1.005   | 0.852   |
|                  |          | (370.80<br>8)    |                        |                  | (0.977) | (0.564) |
| P.Al ×<br>Ni.Al  |          | -11086<br>72.026 | -1106<br>309.91<br>2** | P.Al × Ni.Al     | 0.404   | 0.445   |

| Raw Data         |                   |                      | Log Data         |         |         |
|------------------|-------------------|----------------------|------------------|---------|---------|
| Simple           | Full              | Post                 | Simple           | Full    | Post    |
|                  | (972496<br>.215)  | (3344<br>48.449<br>) |                  | (2.056) | (0.838) |
| P.Al ×<br>Cu.Al  | 167035.<br>211    | P.Al × Cu.Al         |                  | -0.324  |         |
|                  | (107262<br>3.303) |                      |                  | (0.725) |         |
| P.Al ×<br>Mo.Al  | -62114.<br>455    | P.Al ×<br>Mo.Al      |                  | -0.052  | -0.125  |
|                  | (323953<br>.007)  |                      |                  | (0.204) | (0.098) |
| Ni.Al ×<br>Fe.Al | 8445.41<br>6      | 8687.7<br>90+        | Ni.Al ×<br>Fe.Al | 0.480   | 0.503   |
|                  | (14714.<br>848)   | (4320.<br>856)       |                  | (0.741) | (0.428) |
| Ni.Al ×<br>Mo.Al | 160758<br>5.535   | 18021<br>17.228<br>* | Ni.Al ×<br>Mo.Al | 0.108   |         |
|                  | (155725<br>5.946) | (6850<br>29.154<br>) |                  | (0.521) |         |

| Raw Data      |        |                        |                         | Log Data      |        |         |         |
|---------------|--------|------------------------|-------------------------|---------------|--------|---------|---------|
|               | Simple | Full                   | Post                    |               | Simple | Full    | Post    |
| Ni.Al × U.Al  |        | −19089<br>21.405       | −1935<br>629.59<br>4    | Ni.Al × U.Al  |        | −0.941  | −0.927* |
|               |        | (271296<br>5.636)      | (1403<br>540.00<br>7)   |               |        | (1.044) | (0.411) |
| Cu.Al × Fe.Al |        | −20702.<br>818+        | −2062<br>2.940*<br>*    | Cu.Al × Fe.Al |        | 0.086   |         |
|               |        | (10745.<br>142)        | (6112.<br>191)          |               |        | (0.499) |         |
| Cu.Al × Mo.Al |        | −31783<br>76.774*<br>* | −3171<br>616.73<br>3*** | Cu.Al × Mo.Al |        | −0.288  | −0.414* |
|               |        | (977416<br>.177)       | (6065<br>66.726<br>)    |               |        | (0.298) | (0.159) |
| Cu.Al × U.Al  |        | 203163<br>62.992*      | 21255<br>773.72<br>7**  | Cu.Al × U.Al  |        | −0.050  |         |
|               |        | (879793<br>2.238)      | (5822<br>041.63<br>8)   |               |        | (0.739) |         |

|                  | Raw Data |                   |                         |                  | Log Data |         |         |
|------------------|----------|-------------------|-------------------------|------------------|----------|---------|---------|
|                  | Simple   | Full              | Post                    |                  | Simple   | Full    | Post    |
| Mo.Al ×<br>Fe.Al |          | 4434.63<br>2      | 3601.1<br>24*           | Mo.Al ×<br>Fe.Al |          | 0.040   |         |
|                  |          | (3506.8<br>88)    | (1337.<br>239)          |                  |          | (0.340) |         |
| U.Al ×<br>Mo.Al  |          | −32939<br>89.113* | −2982<br>093.94<br>1*** | U.Al ×<br>Mo.Al  |          | −0.064  |         |
|                  |          | (148042<br>8.792) | (6854<br>10.894<br>)    |                  |          | (0.225) |         |
| Num.Obs<br>.     | 38       | 38                | 38                      | Num.Obs.         | 38       | 38      | 38      |
| R2               | 0.748    | 0.959             | 0.957                   | R2               | 0.840    | 0.946   | 0.943   |
| R2 Adj.          | 0.668    | 0.882             | 0.911                   | R2 Adj.          | 0.788    | 0.845   | 0.888   |
| AIC              | 210.1    | 171.5             | 163.3                   | AIC              | 91.9     | 80.8    | 70.8    |
| BIC              | 228.1    | 214.1             | 197.7                   | BIC              | 109.9    | 123.4   | 103.6   |
| Log.Lik.         | −94.057  | −59.758           | −60.66<br>7             | Log.Lik.         | −34.956  | −14.421 | −15.424 |
| F                | 9.254    | 12.55             | 20.880                  | F                | 16.288   | 9.412   | 17.344  |

|                                                            | Raw Data |      |      |                                                            | Log Data |      |      |
|------------------------------------------------------------|----------|------|------|------------------------------------------------------------|----------|------|------|
|                                                            | Simple   | Full | Post |                                                            | Simple   | Full | Post |
| RMSE                                                       | 2.88     | 1.17 | 1.19 | RMSE                                                       | 0.61     | 0.35 | 0.36 |
| + p < 0.1, *<br>p < 0.05, **<br>p < 0.01,<br>*** p < 0.001 |          |      |      | + p < 0.1, *<br>p < 0.05, **<br>p < 0.01,<br>*** p < 0.001 |          |      |      |

| Tukey Data  |          |           |           |
|-------------|----------|-----------|-----------|
|             | Simple   | Full      | Post      |
| (Intercept) | 119.945* | -157.798  | -162.945  |
|             | (47.791) | (406.526) | (208.342) |
| Ti.Al       | 84.610*  | 43.637    | 62.063    |
|             | (35.722) | (242.298) | (166.605) |
| Si.Al       | -16.788+ | -990.657+ | -824.834* |
|             | (8.668)  | (547.569) | (390.478) |
| P.Al        | 4.139    | 287.638   | 323.298*  |
|             | (15.008) | (310.158) | (146.464) |
| Ni.Al       | 0.257    | 43.247    | 35.423*   |
|             | (0.254)  | (32.790)  | (16.413)  |
| Cu.Al       | 0.039+   | -4.441+   | -4.219*   |
|             | (0.019)  | (2.441)   | (1.567)   |
| U.Al        | 3.311    | -53.081   | -59.476*  |

**Tukey Data**

|                  | Simple    | Full      | Post       |
|------------------|-----------|-----------|------------|
|                  | (3.284)   | (40.722)  | (23.494)   |
| Mo.Al            | 35.488*   | 356.269   | 420.074+   |
|                  | (14.562)  | (360.780) | (209.090)  |
| Fe.Al            | -8.738*   | -111.223+ | -120.533** |
|                  | (3.308)   | (55.907)  | (39.043)   |
| Zr.Al            | -222.194  | -380.532  | -384.184+  |
|                  | (132.482) | (260.739) | (208.288)  |
| Ti.Al ×<br>Si.Al |           | -662.691  | -530.662+  |
|                  |           | (404.280) | (276.255)  |
| Ti.Al ×<br>Ni.Al |           | 43.520+   | 39.783*    |
|                  |           | (22.475)  | (14.188)   |
| Ti.Al ×<br>Cu.Al |           | -3.882+   | -3.875*    |
|                  |           | (1.820)   | (1.378)    |
| Si.Al × P.Al     |           | 440.371+  | 425.006*   |
|                  |           | (216.208) | (187.335)  |
| P.Al × Ni.Al     |           | -1.915    |            |
|                  |           | (14.369)  |            |
| P.Al ×<br>Cu.Al  |           | -0.116    |            |
|                  |           | (0.897)   |            |



### Tukey Data

|       |   | Simple | Full      | Post      |
|-------|---|--------|-----------|-----------|
| P.Al  | × |        | -346.341  | -384.636  |
| Mo.Al |   |        |           |           |
|       |   |        | (493.804) | (223.283) |
| Ni.Al | × |        | -5.498+   | -5.710**  |
| Fe.Al |   |        |           |           |
|       |   |        | (2.899)   | (1.742)   |
| Ni.Al | × |        | 14.704    | 18.391*   |
| Mo.Al |   |        |           |           |
|       |   |        | (9.581)   | (6.631)   |
| Ni.Al | × |        | -4.421    | -5.234**  |
| U.Al  |   |        |           |           |
|       |   |        | (2.548)   | (1.626)   |
| Cu.Al | × |        | 0.088     |           |
| Fe.Al |   |        |           |           |
|       |   |        | (0.166)   |           |
| Cu.Al | × |        | 0.340     |           |
| Mo.Al |   |        |           |           |
|       |   |        | (0.696)   |           |
| Cu.Al | × |        | 0.130     | 0.185     |
| U.Al  |   |        |           |           |
|       |   |        | (0.187)   | (0.109)   |
| Mo.Al | × |        | 221.809+  | 219.493*  |
| Fe.Al |   |        |           |           |
|       |   |        | (117.605) | (93.547)  |
| U.Al  | × |        | 43.784    | 54.613    |
| Mo.Al |   |        |           |           |

### Tukey Data

|          | Simple  | Full     | Post     |
|----------|---------|----------|----------|
|          |         | (78.022) | (46.809) |
| Num.Obs. | 38      | 38       | 38       |
| R2       | 0.798   | 0.934    | 0.932    |
| R2 Adj.  | 0.734   | 0.811    | 0.851    |
| AIC      | 190.5   | 178.2    | 171.4    |
| BIC      | 208.5   | 220.8    | 207.4    |
| Log.Lik. | -84.263 | -63.117  | -63.684  |
| F        | 12.319  | 7.635    | 11.603   |
| RMSE     | 2.22    | 1.27     | 1.29     |

+  $p < 0.1$ , \*  $p < 0.05$ , \*\*  $p < 0.01$ , \*\*\*  $p < 0.001$
